# Supplementary material for: Laboratory Findings Associated With Severe Illness and Mortality Among Hospitalized Individuals With Coronavirus Disease 2019 in Eastern Massachusetts
Source: PubMed Central journal article supplement (PMC7599467; doi:10.1001/jamanetworkopen.2020.23934), 2020-10-30

## Supplemental Online Content

Castro VM, McCoy TH, Perlis RH. Laboratory findings associated with severe illness and mortality among hospitalized individuals with coronavirus disease 2019 in Eastern Massachusetts. *JAMA Network Open*. 2020;3(10):e2023934. doi:10.1001/jamanetworkopen.2020.23934

**eTable 1.** Lab Information

**eTable 2.** Lab Value and Flag Comparisons in Training and Test Sets

**eTable 3.** Severe Illness Model Unshrunk Coefficients

**eTable 4.** Mortality Model Unshrunk Coefficients

**eFigure.** Lab Distributions by Mortality Outcome

This supplemental material has been provided by the authors to give readers additional information about their work.

**eTable 1: Lab Information**

| Lab panel            | Lab code | LOINC   | Lab name                                    | Units                     |
|----------------------|----------|---------|---------------------------------------------|---------------------------|
| CBC and differential | BASOP    | 30180-4 | BASOS (%)                                   | %                         |
| CBC and differential | ABASOP   | 26444-0 | BASOS, Absolute (K/uL)                      | K/uL                      |
| CBC and differential | EOSP     | 26450-7 | EOS (%)                                     | %                         |
| CBC and differential | AEOSN    | 26449-9 | EOS, Absolute (K/uL)                        | K/uL                      |
| CBC and differential | IMMGRANP | 71695-1 | Granulocytes, Immature (%)                  | %                         |
| CBC and differential | IMMGRAN  | 51584-1 | Granulocytes, Immature (K/uL)               | K/uL                      |
| CBC and differential | HCT      | 4544-3  | HCT (%)                                     | %                         |
| CBC and differential | HGB      | 718-7   | HGB (g/dL)                                  | g/dL                      |
| CBC and differential | LYMP     | 26478-8 | Lymphocytes (%)                             | %                         |
| CBC and differential | ALYMP    | 26474-7 | Lymphocytes, Absolute (K/uL)                | K/uL                      |
| CBC and differential | MCH      | 785-6   | MCH (pg)                                    | pg                        |
| CBC and differential | MCHC     | 786-4   | MCHC (g/dL)                                 | g/dL                      |
| CBC and differential | MCV      | 787-2   | MCV (fL)                                    | fL                        |
| CBC and differential | MON      | 26485-3 | Monocytes (%)                               | %                         |
| CBC and differential | AMONS    | 26484-6 | Monocytes, Absolute (K/uL)                  | K/uL                      |
| CBC and differential | MVP      | 776-5   | MPV (fL)                                    | fL                        |
| CBC and differential | NEUT     | 26511-6 | Neutrophils (%)                             | %                         |
| CBC and differential | ANEU     | 26499-4 | Neutrophils, Absolute (K/uL)                | K/uL                      |
| CBC and differential | NRBC     | 19048-8 | NRBC% (/100 WBC)                            | /100 WBCs                 |
| CBC and differential | NRBCA    | 771-6   | NRBC, Absolute (K/uL)                       | K/uL                      |
| CBC and differential | PLT      | 777-3   | PLT (K/uL)                                  | K/uL                      |
| CBC and differential | RBC      | 789-8   | RBC (M/uL)                                  | M/uL                      |
| CBC and differential | RDW      | 788-0   | RDW (%)                                     | %                         |
| CBC and differential | WBC      | 6690-2  | WBC (K/uL)                                  | K/uL                      |
| Hepatic panel        | ALB      | 1751-7  | Albumin (g/dL)                              | g/dL                      |
| Hepatic panel        | SGPT     | 1742-6  | ALT (U/L)                                   | U/L                       |
| Hepatic panel        | SGOT     | 1920-8  | AST (U/L)                                   | U/L                       |
| Hepatic panel        | DBILI    | 1968-7  | Bilirubin, Direct (mg/dL)                   | mg/dL                     |
| Hepatic panel        | TBILI    | 1975-2  | Bilirubin, Total (mg/dL)                    | mg/dL                     |
| Hepatic panel        | GLOB     | 2336-6  | Globulin (g/dL)                             | g/dL                      |
| Hepatic panel        | TP       | 2885-2  | Protein, Total (g/dL)                       | g/dL                      |
| Metabolic panel      | ALKP     | 6768-6  | Alkaline Phosphatase (U/L)                  | U/L                       |
| Metabolic panel      | ANION    | 10466-1 | Anion Gap (mmol/L)                          | mmol/L                    |
| Metabolic panel      | BUN      | 3094-0  | BUN (mg/dL)                                 | mg/dL                     |
| Metabolic panel      | CA       | 17861-6 | Calcium (mg/dL)                             | mg/dL                     |
| Metabolic panel      | CO2      | 2028-9  | Carbon dioxide (mmol/L)                     | mmol/L                    |
| Metabolic panel      | CL       | 2075-0  | Chloride (mmol/L)                           | mmol/L                    |
| Metabolic panel      | CPK      | 2157-6  | Creatinine Kinase (U/L)                     | U/L                       |
| Metabolic panel      | GFR      | 33914-3 | GFR, estimated (mL/min/1.73m <sup>2</sup> ) | mL/min/1.73m <sup>2</sup> |
| Metabolic panel      | GLU      | 2345-7  | Glucose (mg/dL)                             | mg/dL                     |
| Metabolic panel      | K        | 2823-3  | Potassium (mmol/L)                          | mmol/L                    |
| Metabolic panel      | NA       | 2951-2  | Sodium (mmol/L)                             | mmol/L                    |
| Additional Labs      | CRPT     | 1988-5  | C-Reactive Protein (mg/L)                   | mg/L                      |
| Additional Labs      | DDIMER*  | 48058-2 | D-DIMER (ng/ml)                             | ng/mL                     |
| Additional Labs      | ESR      | 4537-7  | ESR (mm/h)                                  | mm/h                      |
| Additional Labs      | FER      | 2276-4  | Ferritin (ug/L)                             | ug/L                      |
| Additional Labs      | LACT     | 2524-7  | Lactic Acid (mmol/L)                        | mmol/L                    |
| Additional Labs      | LDH      | 2532-0  | LDH (U/L)                                   | U/L                       |
| Additional Labs      | MG       | 2601-3  | Magnesium (mg/dL)                           | mg/dL                     |
| Additional Labs      | PRCCITON | 33959-8 | Procalcitonin (ng/mL)                       | ng/mL                     |
| Additional Labs      | TROPTHS  | 67151-1 | Troponin T (ng/L)                           | ng/L                      |

\* Some results were reported in different units and converted to normal units shown

**eTable 2: Lab value and flag comparisons in training and test sets**

|                                      | <b>Train<br/>(N=1877)</b>      | <b>Test<br/>(N=634)</b>         | <b>Total<br/>(N=2511)</b>      | <b>p<br/>value</b> |
|--------------------------------------|--------------------------------|---------------------------------|--------------------------------|--------------------|
| <b>C-Reactive Protein<br/>(mg/L)</b> |                                |                                 |                                | 0.036              |
| N-Miss                               | 139                            | 117                             | 256                            |                    |
| Median (Q1, Q3)                      | 63.900 (25.700, 124.700)       | 74.100 (18.600, 133.300)        | 65.300 (25.100, 126.750)       |                    |
| High Flag                            | 1568 (83.5%)                   | 454 (71.6%)                     | 2022 (80.5%)                   |                    |
| <b>DDIMER</b>                        |                                |                                 |                                | 0.069              |
| N-Miss                               | 206                            | 88                              | 294                            |                    |
| Median (Q1, Q3)                      | 904.000 (580.000,<br>1570.000) | 1002.500 (577.250,<br>1960.250) | 918.000 (580.000,<br>1668.000) |                    |
| High                                 | 1367 (72.8%)                   | 434 (68.5%)                     | 1801 (71.7%)                   |                    |
| <b>ESR (mm/h)</b>                    |                                |                                 |                                | <<br>0.001         |
| N-Miss                               | 401                            | 267                             | 668                            |                    |
| Median (Q1, Q3)                      | 42.000 (25.000, 67.000)        | 51.000 (31.000, 79.000)         | 44.000 (26.000, 69.000)        |                    |
| High                                 | 1272 (67.8%)                   | 319 (50.3%)                     | 1591 (63.4%)                   |                    |
| High Panic                           | 1 (0.1%)                       | 0 (0.0%)                        | 1 (0.0%)                       |                    |
| <b>Ferritin (ug/L)</b>               |                                |                                 |                                | 0.655              |
| N-Miss                               | 139                            | 95                              | 234                            |                    |
| Median (Q1, Q3)                      | 506.000 (241.250,<br>933.500)  | 411.000 (200.500, 913.000)      | 495.000 (227.000,<br>929.000)  |                    |
| High                                 | 1293 (68.9%)                   | 375 (59.1%)                     | 1668 (66.4%)                   |                    |
| Low                                  | 5 (0.3%)                       | 5 (0.8%)                        | 10 (0.4%)                      |                    |
| <b>LDH (U/L)</b>                     |                                |                                 |                                | 0.040              |
| N-Miss                               | 141                            | 93                              | 234                            |                    |
| Median (Q1, Q3)                      | 277.500 (219.000,<br>356.000)  | 283.000 (225.000, 379.000)      | 279.000 (221.000,<br>360.000)  |                    |
| High                                 | 1316 (70.1%)                   | 397 (62.6%)                     | 1713 (68.2%)                   |                    |
| Low                                  | 3 (0.2%)                       | 8 (1.3%)                        | 11 (0.4%)                      |                    |
| <b>Magnesium (mg/dL)</b>             |                                |                                 |                                | 0.748              |
| N-Miss                               | 337                            | 46                              | 383                            |                    |
| Median (Q1, Q3)                      | 2.000 (1.900, 2.200)           | 2.000 (1.900, 2.200)            | 2.000 (1.900, 2.200)           |                    |
| High                                 | 55 (2.9%)                      | 15 (2.4%)                       | 70 (2.8%)                      |                    |
| Low                                  | 93 (5.0%)                      | 37 (5.8%)                       | 130 (5.2%)                     |                    |
| Low Panic                            | 1 (0.1%)                       | 0 (0.0%)                        | 1 (0.0%)                       |                    |
| <b>Procalcitonin<br/>(ng/mL)</b>     |                                |                                 |                                | 0.021              |
| N-Miss                               | 289                            | 69                              | 358                            |                    |
| Median (Q1, Q3)                      | 0.130 (0.080, 0.230)           | 0.120 (0.060, 0.260)            | 0.120 (0.080, 0.240)           |                    |
| High                                 | 1129 (60.1%)                   | 316 (49.8%)                     | 1445 (57.5%)                   |                    |
| <b>Troponin T (ng/L)</b>             |                                |                                 |                                | 0.040              |
| N-Miss                               | 188                            | 79                              | 267                            |                    |
| Median (Q1, Q3)                      | 12.000 (6.000, 31.000)         | 12.000 (7.000, 26.000)          | 12.000 (6.000, 29.000)         |                    |
| High                                 | 862 (45.9%)                    | 286 (45.1%)                     | 1148 (45.7%)                   |                    |
| <b>BASOS (%)</b>                     |                                |                                 |                                | <<br>0.001         |
| N-Miss                               | 115                            | 19                              | 134                            |                    |
| Median (Q1, Q3)                      | 0.300 (0.200, 0.500)           | 0.200 (0.100, 0.400)            | 0.300 (0.200, 0.400)           |                    |
| High                                 | 12 (0.6%)                      | 2 (0.3%)                        | 14 (0.6%)                      |                    |

|                                      |                         |                         |                         |            |
|--------------------------------------|-------------------------|-------------------------|-------------------------|------------|
| <b>BASOS, Absolute (K/uL)</b>        |                         |                         |                         | <<br>0.001 |
| N-Miss                               | 115                     | 19                      | 134                     |            |
| Median (Q1, Q3)                      | 0.020 (0.010, 0.030)    | 0.010 (0.010, 0.020)    | 0.020 (0.010, 0.030)    |            |
| High                                 | 2 (0.1%)                | 4 (0.6%)                | 6 (0.2%)                |            |
| <b>EOS (%)</b>                       |                         |                         |                         | 0.002      |
| N-Miss                               | 89                      | 17                      | 106                     |            |
| Median (Q1, Q3)                      | 0.500 (0.000, 1.600)    | 0.300 (0.000, 1.200)    | 0.400 (0.000, 1.500)    |            |
| High                                 | 58 (3.1%)               | 16 (2.5%)               | 74 (2.9%)               |            |
| <b>EOS, Absolute (K/uL)</b>          |                         |                         |                         | 0.002      |
| N-Miss                               | 89                      | 17                      | 106                     |            |
| Median (Q1, Q3)                      | 0.030 (0.000, 0.090)    | 0.020 (0.000, 0.070)    | 0.030 (0.000, 0.090)    |            |
| High                                 | 24 (1.3%)               | 4 (0.6%)                | 28 (1.1%)               |            |
| Low                                  | 304 (16.2%)             | 0 (0.0%)                | 304 (12.1%)             |            |
| <b>Granulocytes, Immature (%)</b>    |                         |                         |                         | 0.466      |
| N-Miss                               | 172                     | 63                      | 235                     |            |
| Median (Q1, Q3)                      | 0.500 (0.300, 0.800)    | 0.500 (0.300, 0.800)    | 0.500 (0.300, 0.800)    |            |
| High                                 | 219 (11.7%)             | 97 (15.3%)              | 316 (12.6%)             |            |
| <b>Granulocytes, Immature (K/uL)</b> |                         |                         |                         | 0.580      |
| N-Miss                               | 172                     | 63                      | 235                     |            |
| Median (Q1, Q3)                      | 0.030 (0.020, 0.050)    | 0.030 (0.020, 0.060)    | 0.030 (0.020, 0.050)    |            |
| High                                 | 178 (9.5%)              | 74 (11.7%)              | 252 (10.0%)             |            |
| <b>HCT (%)</b>                       |                         |                         |                         | 0.003      |
| Median (Q1, Q3)                      | 37.400 (33.500, 40.700) | 36.500 (33.025, 39.800) | 37.100 (33.400, 40.500) |            |
| High                                 | 17 (0.9%)               | 4 (0.6%)                | 21 (0.8%)               |            |
| High Panic                           | 1 (0.1%)                | 0 (0.0%)                | 1 (0.0%)                |            |
| Low                                  | 1021 (54.4%)            | 353 (55.7%)             | 1374 (54.7%)            |            |
| Low Panic                            | 1 (0.1%)                | 1 (0.2%)                | 2 (0.1%)                |            |
| <b>HGB (g/dL)</b>                    |                         |                         |                         | <<br>0.001 |
| Median (Q1, Q3)                      | 12.300 (10.800, 13.500) | 11.800 (10.600, 13.000) | 12.100 (10.750, 13.400) |            |
| High                                 | 5 (0.3%)                | 3 (0.5%)                | 8 (0.3%)                |            |
| Low                                  | 1101 (58.7%)            | 368 (58.0%)             | 1469 (58.5%)            |            |
| Low Panic                            | 0 (0.0%)                | 1 (0.2%)                | 1 (0.0%)                |            |
| <b>Lymphocytes (%)</b>               |                         |                         |                         | 0.108      |
| N-Miss                               | 35                      | 16                      | 51                      |            |
| Median (Q1, Q3)                      | 19.550 (12.800, 27.700) | 20.850 (13.400, 29.150) | 19.850 (13.000, 28.100) |            |
| High                                 | 118 (6.3%)              | 47 (7.4%)               | 165 (6.6%)              |            |
| Low                                  | 886 (47.2%)             | 255 (40.2%)             | 1141 (45.4%)            |            |
| <b>Lymphocytes, Absolute (K/uL)</b>  |                         |                         |                         | 0.149      |
| N-Miss                               | 35                      | 16                      | 51                      |            |
| Median (Q1, Q3)                      | 1.140 (0.790, 1.590)    | 1.190 (0.770, 1.660)    | 1.150 (0.780, 1.610)    |            |
| High                                 | 11 (0.6%)               | 8 (1.3%)                | 19 (0.8%)               |            |
| Low                                  | 747 (39.8%)             | 151 (23.8%)             | 898 (35.8%)             |            |
| <b>MCH (pg)</b>                      |                         |                         |                         | 0.248      |
| Median (Q1, Q3)                      | 29.200 (27.900, 30.400) | 29.100 (27.400, 30.700) | 29.200 (27.800, 30.400) |            |
| High                                 | 100 (5.3%)              | 52 (8.2%)               | 152 (6.1%)              |            |
| Low                                  | 222 (11.8%)             | 126 (19.9%)             | 348 (13.9%)             |            |

|                                     |                            |                            |                            |            |
|-------------------------------------|----------------------------|----------------------------|----------------------------|------------|
| <b>MCHC (g/dL)</b>                  |                            |                            |                            | <<br>0.001 |
| Median (Q1, Q3)                     | 32.900 (31.800, 33.700)    | 32.450 (31.425, 33.300)    | 32.800 (31.700, 33.600)    |            |
| High                                | 7 (0.4%)                   | 8 (1.3%)                   | 15 (0.6%)                  |            |
| Low                                 | 364 (19.4%)                | 224 (35.3%)                | 588 (23.4%)                |            |
| <b>MCV (fL)</b>                     |                            |                            |                            | 0.021      |
| Median (Q1, Q3)                     | 88.300 (84.800, 92.100)    | 88.900 (84.900, 93.700)    | 88.500 (84.800, 92.500)    |            |
| High                                | 79 (4.2%)                  | 61 (9.6%)                  | 140 (5.6%)                 |            |
| Low                                 | 136 (7.2%)                 | 44 (6.9%)                  | 180 (7.2%)                 |            |
| <b>Monocytes (%)</b>                |                            |                            |                            | 0.101      |
| N-Miss                              | 37                         | 16                         | 53                         |            |
| Median (Q1, Q3)                     | 7.700 (5.400, 10.200)      | 7.900 (5.600, 10.700)      | 7.700 (5.500, 10.300)      |            |
| High                                | 251 (13.4%)                | 138 (21.8%)                | 389 (15.5%)                |            |
| Low                                 | 215 (11.5%)                | 68 (10.7%)                 | 283 (11.3%)                |            |
| <b>Monocytes, Absolute (K/uL)</b>   |                            |                            |                            | 0.066      |
| N-Miss                              | 37                         | 16                         | 53                         |            |
| Median (Q1, Q3)                     | 0.440 (0.290, 0.630)       | 0.480 (0.320, 0.650)       | 0.450 (0.300, 0.640)       |            |
| High                                | 74 (3.9%)                  | 33 (5.2%)                  | 107 (4.3%)                 |            |
| Low                                 | 156 (8.3%)                 | 38 (6.0%)                  | 194 (7.7%)                 |            |
| <b>MPV (fL)</b>                     |                            |                            |                            | <<br>0.001 |
| N-Miss                              | 41                         | 14                         | 55                         |            |
| Median (Q1, Q3)                     | 10.300 (9.700, 11.000)     | 10.600 (9.900, 11.200)     | 10.400 (9.800, 11.100)     |            |
| High                                | 113 (6.0%)                 | 66 (10.4%)                 | 179 (7.1%)                 |            |
| Low                                 | 57 (3.0%)                  | 2 (0.3%)                   | 59 (2.3%)                  |            |
| <b>Neutrophils (%)</b>              |                            |                            |                            | 0.711      |
| N-Miss                              | 35                         | 16                         | 51                         |            |
| Median (Q1, Q3)                     | 68.650 (58.700, 77.400)    | 67.600 (58.075, 77.700)    | 68.300 (58.500, 77.400)    |            |
| High                                | 773 (41.2%)                | 187 (29.5%)                | 960 (38.2%)                |            |
| Low                                 | 125 (6.7%)                 | 65 (10.3%)                 | 190 (7.6%)                 |            |
| <b>Neutrophils, Absolute (K/uL)</b> |                            |                            |                            | 0.997      |
| N-Miss                              | 35                         | 16                         | 51                         |            |
| Median (Q1, Q3)                     | 4.000 (2.740, 5.648)       | 4.030 (2.675, 5.603)       | 4.000 (2.718, 5.640)       |            |
| High                                | 226 (12.0%)                | 79 (12.5%)                 | 305 (12.1%)                |            |
| Low                                 | 138 (7.4%)                 | 67 (10.6%)                 | 205 (8.2%)                 |            |
| Low Panic                           | 0 (0.0%)                   | 1 (0.2%)                   | 1 (0.0%)                   |            |
| <b>NRBC% (/100 WBC)</b>             |                            |                            |                            | NaN        |
| Median (Q1, Q3)                     | 0.000 (0.000, 0.000)       | 0.000 (0.000, 0.000)       | 0.000 (0.000, 0.000)       |            |
| High                                | 53 (2.8%)                  | 29 (4.6%)                  | 82 (3.3%)                  |            |
| <b>NRBC, Absolute (K/uL)</b>        |                            |                            |                            | NaN        |
| N-Miss                              | 361                        | 4                          | 365                        |            |
| Median (Q1, Q3)                     | 0.000 (0.000, 0.000)       | 0.000 (0.000, 0.000)       | 0.000 (0.000, 0.000)       |            |
| High                                | 50 (2.7%)                  | 28 (4.4%)                  | 78 (3.1%)                  |            |
| <b>PLT (K/uL)</b>                   |                            |                            |                            | 0.936      |
| N-Miss                              | 4                          | 0                          | 4                          |            |
| Median (Q1, Q3)                     | 203.000 (155.000, 265.000) | 199.500 (154.250, 267.000) | 203.000 (155.000, 265.000) |            |
| High                                | 89 (4.7%)                  | 12 (1.9%)                  | 101 (4.0%)                 |            |
| Low                                 | 387 (20.6%)                | 135 (21.3%)                | 522 (20.8%)                |            |
| Low Panic                           | 6 (0.3%)                   | 4 (0.6%)                   | 10 (0.4%)                  |            |

|                                  |                         |                         |                         |            |
|----------------------------------|-------------------------|-------------------------|-------------------------|------------|
| <b>RBC (M/uL)</b>                |                         |                         |                         | <<br>0.001 |
| Median (Q1, Q3)                  | 4.250 (3.740, 4.680)    | 4.115 (3.680, 4.530)    | 4.210 (3.725, 4.650)    |            |
| High                             | 40 (2.1%)               | 3 (0.5%)                | 43 (1.7%)               |            |
| Low                              | 885 (47.1%)             | 308 (48.6%)             | 1193 (47.5%)            |            |
| <b>RDW (%)</b>                   |                         |                         |                         | <<br>0.001 |
| N-Miss                           | 1                       | 0                       | 1                       |            |
| Median (Q1, Q3)                  | 13.500 (12.800, 14.600) | 13.950 (13.000, 15.200) | 13.600 (12.800, 14.700) |            |
| High                             | 484 (25.8%)             | 226 (35.6%)             | 710 (28.3%)             |            |
| Low                              | 17 (0.9%)               | 5 (0.8%)                | 22 (0.9%)               |            |
| <b>WBC (K/uL)</b>                |                         |                         |                         | 0.589      |
| Median (Q1, Q3)                  | 5.940 (4.520, 7.790)    | 5.895 (4.470, 7.950)    | 5.920 (4.510, 7.840)    |            |
| High                             | 151 (8.0%)              | 70 (11.0%)              | 221 (8.8%)              |            |
| High Panic                       | 0 (0.0%)                | 1 (0.2%)                | 1 (0.0%)                |            |
| Low                              | 402 (21.4%)             | 98 (15.5%)              | 500 (19.9%)             |            |
| Low Panic                        | 0 (0.0%)                | 6 (0.9%)                | 6 (0.2%)                |            |
| <b>Albumin (g/dL)</b>            |                         |                         |                         | 0.947      |
| N-Miss                           | 84                      | 20                      | 104                     |            |
| Median (Q1, Q3)                  | 3.400 (3.100, 3.700)    | 3.400 (3.100, 3.700)    | 3.400 (3.100, 3.700)    |            |
| High                             | 2 (0.1%)                | 0 (0.0%)                | 2 (0.1%)                |            |
| Low                              | 781 (41.6%)             | 330 (52.1%)             | 1111 (44.2%)            |            |
| <b>ALT (U/L)</b>                 |                         |                         |                         | 0.022      |
| N-Miss                           | 84                      | 25                      | 109                     |            |
| Median (Q1, Q3)                  | 25.000 (15.000, 43.000) | 23.000 (14.000, 38.000) | 24.000 (15.000, 42.000) |            |
| High                             | 401 (21.4%)             | 100 (15.8%)             | 501 (20.0%)             |            |
| Low                              | 130 (6.9%)              | 41 (6.5%)               | 171 (6.8%)              |            |
| <b>AST (U/L)</b>                 |                         |                         |                         | 0.038      |
| N-Miss                           | 84                      | 25                      | 109                     |            |
| Median (Q1, Q3)                  | 34.000 (24.000, 52.000) | 32.000 (23.000, 49.000) | 34.000 (24.000, 51.000) |            |
| High                             | 748 (39.9%)             | 150 (23.7%)             | 898 (35.8%)             |            |
| Low                              | 35 (1.9%)               | 3 (0.5%)                | 38 (1.5%)               |            |
| <b>Bilirubin, Direct (mg/dL)</b> |                         |                         |                         | <<br>0.001 |
| N-Miss                           | 207                     | 50                      | 257                     |            |
| Median (Q1, Q3)                  | 0.200 (0.200, 0.200)    | 0.200 (0.200, 0.200)    | 0.200 (0.200, 0.200)    |            |
| High                             | 81 (4.3%)               | 36 (5.7%)               | 117 (4.7%)              |            |
| Low                              | 0 (0.0%)                | 1 (0.2%)                | 1 (0.0%)                |            |
| <b>Bilirubin, Total (mg/dL)</b>  |                         |                         |                         | 0.424      |
| N-Miss                           | 84                      | 20                      | 104                     |            |
| Median (Q1, Q3)                  | 0.400 (0.300, 0.600)    | 0.400 (0.300, 0.500)    | 0.400 (0.300, 0.600)    |            |
| High                             | 73 (3.9%)               | 28 (4.4%)               | 101 (4.0%)              |            |
| <b>Globulin (g/dL)</b>           |                         |                         |                         | 0.001      |
| N-Miss                           | 85                      | 20                      | 105                     |            |
| Median (Q1, Q3)                  | 3.400 (3.100, 3.800)    | 3.300 (2.900, 3.800)    | 3.400 (3.000, 3.800)    |            |
| High                             | 197 (10.5%)             | 57 (9.0%)               | 254 (10.1%)             |            |
| Low                              | 3 (0.2%)                | 10 (1.6%)               | 13 (0.5%)               |            |
| <b>Protein, Total (g/dL)</b>     |                         |                         |                         | 0.010      |
| N-Miss                           | 85                      | 20                      | 105                     |            |
| Median (Q1, Q3)                  | 6.900 (6.400, 7.300)    | 6.800 (6.300, 7.300)    | 6.900 (6.400, 7.300)    |            |
| High                             | 40 (2.1%)               | 21 (3.3%)               | 61 (2.4%)               |            |

|                                       |                           |                           |                           |            |
|---------------------------------------|---------------------------|---------------------------|---------------------------|------------|
| Low                                   | 160 (8.5%)                | 150 (23.7%)               | 310 (12.3%)               |            |
| <b>Alkaline Phosphatase (U/L)</b>     |                           |                           |                           | 0.547      |
| N-Miss                                | 85                        | 22                        | 107                       |            |
| Median (Q1, Q3)                       | 74.000 (58.000, 96.000)   | 71.000 (57.000, 96.000)   | 74.000 (57.000, 96.000)   |            |
| High                                  | 299 (15.9%)               | 68 (10.7%)                | 367 (14.6%)               |            |
| Low                                   | 38 (2.0%)                 | 19 (3.0%)                 | 57 (2.3%)                 |            |
| <b>Anion Gap (mmol/L)</b>             |                           |                           |                           | <<br>0.001 |
| N-Miss                                | 37                        | 12                        | 49                        |            |
| Median (Q1, Q3)                       | 13.000 (12.000, 15.000)   | 14.000 (12.000, 16.000)   | 14.000 (12.000, 15.000)   |            |
| High                                  | 107 (5.7%)                | 64 (10.1%)                | 171 (6.8%)                |            |
| Low                                   | 0 (0.0%)                  | 1 (0.2%)                  | 1 (0.0%)                  |            |
| <b>BUN (mg/dL)</b>                    |                           |                           |                           | 0.388      |
| N-Miss                                | 35                        | 12                        | 47                        |            |
| Median (Q1, Q3)                       | 14.000 (10.000, 22.000)   | 15.000 (10.000, 23.000)   | 14.000 (10.000, 22.000)   |            |
| High                                  | 428 (22.8%)               | 157 (24.8%)               | 585 (23.3%)               |            |
| Low                                   | 194 (10.3%)               | 25 (3.9%)                 | 219 (8.7%)                |            |
| <b>Calcium (mg/dL)</b>                |                           |                           |                           | <<br>0.001 |
| N-Miss                                | 35                        | 12                        | 47                        |            |
| Median (Q1, Q3)                       | 8.800 (8.500, 9.100)      | 8.600 (8.300, 9.000)      | 8.800 (8.400, 9.100)      |            |
| High                                  | 10 (0.5%)                 | 2 (0.3%)                  | 12 (0.5%)                 |            |
| Low                                   | 646 (34.4%)               | 314 (49.5%)               | 960 (38.2%)               |            |
| Low Panic                             | 1 (0.1%)                  | 0 (0.0%)                  | 1 (0.0%)                  |            |
| <b>Carbon dioxide (mmol/L)</b>        |                           |                           |                           | 0.475      |
| N-Miss                                | 36                        | 12                        | 48                        |            |
| Median (Q1, Q3)                       | 24.000 (22.000, 26.000)   | 24.000 (22.000, 26.000)   | 24.000 (22.000, 26.000)   |            |
| High                                  | 17 (0.9%)                 | 12 (1.9%)                 | 29 (1.2%)                 |            |
| Low                                   | 476 (25.4%)               | 148 (23.3%)               | 624 (24.9%)               |            |
| <b>Chloride (mmol/L)</b>              |                           |                           |                           | 0.678      |
| N-Miss                                | 35                        | 12                        | 47                        |            |
| Median (Q1, Q3)                       | 101.000 (98.000, 104.000) | 101.000 (98.000, 104.000) | 101.000 (98.000, 104.000) |            |
| High                                  | 177 (9.4%)                | 59 (9.3%)                 | 236 (9.4%)                |            |
| Low                                   | 303 (16.1%)               | 125 (19.7%)               | 428 (17.0%)               |            |
| <b>Creatinine Kinase (U/L)</b>        |                           |                           |                           | 0.969      |
| N-Miss                                | 171                       | 89                        | 260                       |            |
| Median (Q1, Q3)                       | 99.000 (55.000, 208.750)  | 95.000 (51.000, 198.000)  | 99.000 (54.000, 205.500)  |            |
| High                                  | 324 (17.3%)               | 122 (19.2%)               | 446 (17.8%)               |            |
| High Panic                            | 0 (0.0%)                  | 1 (0.2%)                  | 1 (0.0%)                  |            |
| Low                                   | 250 (13.3%)               | 80 (12.6%)                | 330 (13.1%)               |            |
| <b>GFR, estimated (mL/min/1.73m2)</b> |                           |                           |                           | 0.017      |
| N-Miss                                | 33                        | 13                        | 46                        |            |
| Median (Q1, Q3)                       | 85.000 (57.000, 103.000)  | 80.000 (54.000, 98.000)   | 84.000 (57.000, 102.000)  |            |
| Low                                   | 496 (26.4%)               | 181 (28.5%)               | 677 (27.0%)               |            |
| <b>Glucose (mg/dL)</b>                |                           |                           |                           | 0.753      |
| N-Miss                                | 33                        | 12                        | 45                        |            |
| Median (Q1, Q3)                       | 109.000 (97.000, 133.000) | 107.000 (93.000, 134.750) | 109.000 (96.000, 133.000) |            |
| High                                  | 1026 (54.7%)              | 334 (52.7%)               | 1360 (54.2%)              |            |
| High Panic                            | 1 (0.1%)                  | 1 (0.2%)                  | 2 (0.1%)                  |            |

|                               |                      |                      |                      |       |
|-------------------------------|----------------------|----------------------|----------------------|-------|
| Low                           | 22 (1.2%)            | 6 (0.9%)             | 28 (1.1%)            |       |
| Low Panic                     | 1 (0.1%)             | 0 (0.0%)             | 1 (0.0%)             |       |
| <b>Potassium<br/>(mmol/L)</b> |                      |                      |                      | 0.595 |
| N-Miss                        | 37                   | 14                   | 51                   |       |
| Median (Q1, Q3)               | 4.000 (3.700, 4.300) | 4.000 (3.700, 4.300) | 4.000 (3.700, 4.300) |       |
| High                          | 25 (1.3%)            | 8 (1.3%)             | 33 (1.3%)            |       |
| High Panic                    | 3 (0.2%)             | 0 (0.0%)             | 3 (0.1%)             |       |
| Low                           | 152 (8.1%)           | 35 (5.5%)            | 187 (7.4%)           |       |
| Low Panic                     | 4 (0.2%)             | 0 (0.0%)             | 4 (0.2%)             |       |



**eTable 3: Severe illness model unshrunk coefficients**

| <b>Feature</b>                                      | <b>Coefficient</b> | <b>95% CI Low</b> | <b>95% CI High</b> |
|-----------------------------------------------------|--------------------|-------------------|--------------------|
| (Intercept)                                         | -1.5015            | -5.3984           | 2.2352             |
| Age at admission                                    | 0.0249             | 0.0146            | 0.0354             |
| Baseline O2Sat                                      | -0.0364            | -0.0648           | -0.0067            |
| Charlson comorbidity index                          | 0.0514             | 0.0011            | 0.1012             |
| Lymphocytes (%) (continuous)                        | -0.0137            | -0.0473           | 0.0202             |
| Neutrophils (%) (continuous)                        | -0.0104            | -0.0359           | 0.0156             |
| EOS (%) (continuous)                                | -0.6978            | -0.9156           | -0.4985            |
| C-reactive protein (mg/L) (continuous)              | 0.0039             | 0.0015            | 0.0064             |
| LDH (U/L) (continuous)                              | 0.0052             | 0.0038            | 0.0067             |
| Platelets (K/uL) (continuous)                       | -0.0040            | -0.0067           | -0.0014            |
| Troponin T (ng/dL) (continuous)                     | 0.0079             | 0.0016            | 0.0142             |
| Glucose (mg/dL) (continuous)                        | 0.0067             | 0.0031            | 0.0103             |
| BUN (mg/dL) (continuous)                            | 0.0005             | -0.0177           | 0.0187             |
| Prior diagnosis of respiratory infections (CCS 8.1) | 0.2598             | 0.1255            | 0.3940             |
| Neutrophils, absolute (High)                        | 0.5716             | 0.1414            | 1.0019             |
| Monocytes (Low)                                     | 0.5515             | 0.1450            | 0.9538             |
| Lymphocytes, absolute (Low)                         | 0.4969             | 0.1408            | 0.8548             |
| Platelets (Low)                                     | 0.1801             | -0.2386           | 0.5974             |
| eGFR (Low)                                          | 0.0992             | -0.3988           | 0.5872             |
| Creatinine (High)                                   | 0.4348             | -0.1105           | 0.9859             |

**eTable 4: Mortality model unshrunk coefficients**

| <b>Feature</b>                                                 | <b>Coefficient</b> | <b>95% CI Low</b> | <b>95% CI High</b> |
|----------------------------------------------------------------|--------------------|-------------------|--------------------|
| (Intercept)                                                    | -6.7340            |                   |                    |
| NRBC, absolute (High)                                          | 0.9345             | 0.0118            | 1.8649             |
| Platelets (Low)                                                | 0.7197             | 0.3114            | 1.1274             |
| WBC (High)                                                     | 0.6404             | -0.1337           | 1.4107             |
| Creatinine (High)                                              | 0.6048             | -0.0336           | 1.2538             |
| Lymphocytes, absolute (Low)                                    | 0.5467             | 0.0610            | 1.0395             |
| Procalcitonin (ng/mL) (continuous)                             | 0.4680             | -0.0261           | 0.9548             |
| MCHC (Low)                                                     | 0.4201             | -0.0169           | 0.8526             |
| Neutrophils, absolute (High)                                   | 0.3173             | -0.3526           | 0.9748             |
| Prior diagnosis of lung cancer (CCS 2.3)                       | 0.3019             | -0.0038           | 0.6261             |
| Prior diagnosis of external causes of injury (CCS 18)          | 0.1907             | 0.0283            | 0.3542             |
| Prior diagnosis of respiratory failure/insufficiency (CCS 8.6) | 0.1659             | -0.0931           | 0.4191             |
| RDW (%) (continuous)                                           | 0.1174             | -0.0185           | 0.2515             |
| Prior diagnosis of COPD/bronchiectasis (CCS 8.2)               | 0.0953             | -0.0939           | 0.2821             |
| Age at admission                                               | 0.0664             | 0.0500            | 0.0838             |
| Prior diagnosis of dementia/delirium (CCS 5.4)                 | 0.0615             | -0.1077           | 0.2277             |
| Charlson comorbidity index                                     | 0.0127             | -0.0598           | 0.0836             |
| BUN (mg/dL) (continuous)                                       | 0.0102             | -0.0111           | 0.0313             |
| LDH (U/L) (continuous)                                         | 0.0042             | 0.0023            | 0.0061             |
| Troponin T (ng/dL) (continuous)                                | 0.0024             | -0.0053           | 0.0101             |
| Lymphocytes (%) (continuous)                                   | -0.0025            | -0.0306           | 0.0249             |
| eGFR (Low)                                                     | -0.0263            | -0.6209           | 0.5527             |
| Baseline O2Sat                                                 | -0.0479            | -0.0797           | -0.0124            |
| EOS (%) (continuous)                                           | -0.8193            | -1.1151           | -0.5564            |

# eFigure: Lab distributions by mortality outcome

Distribution of CBC and differential panel results at baseline

Mortality contrast, n=2,511

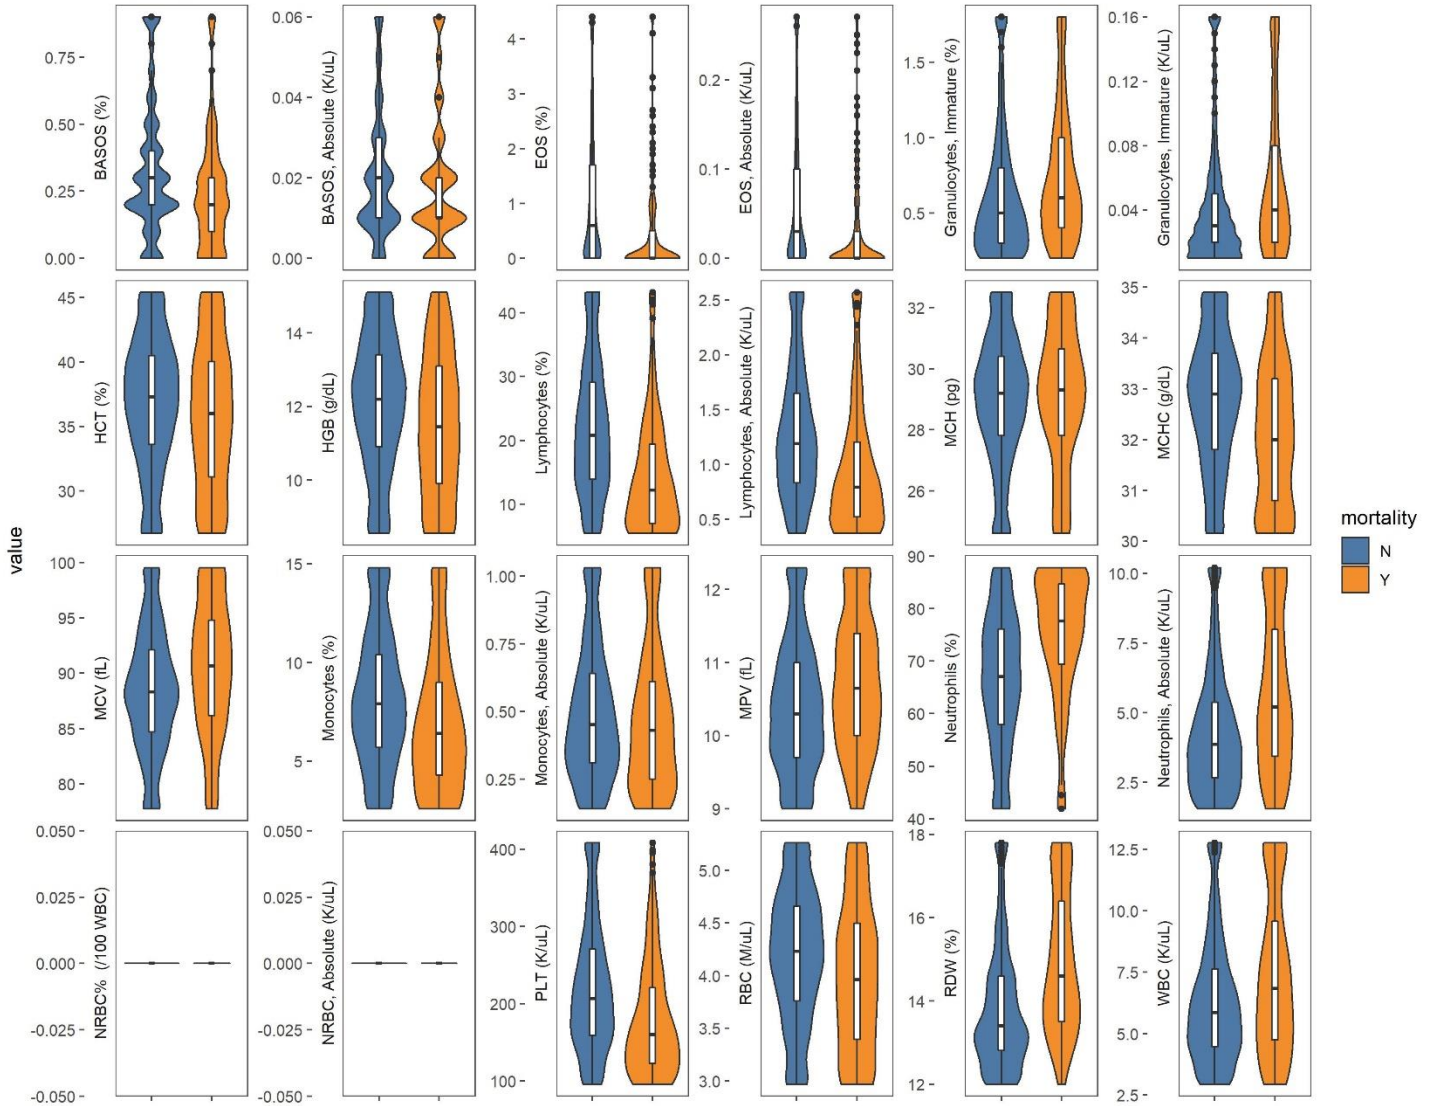

### Distribution of metabolic and hepatic panel results at baseline

Mortality contrast, n=2,511

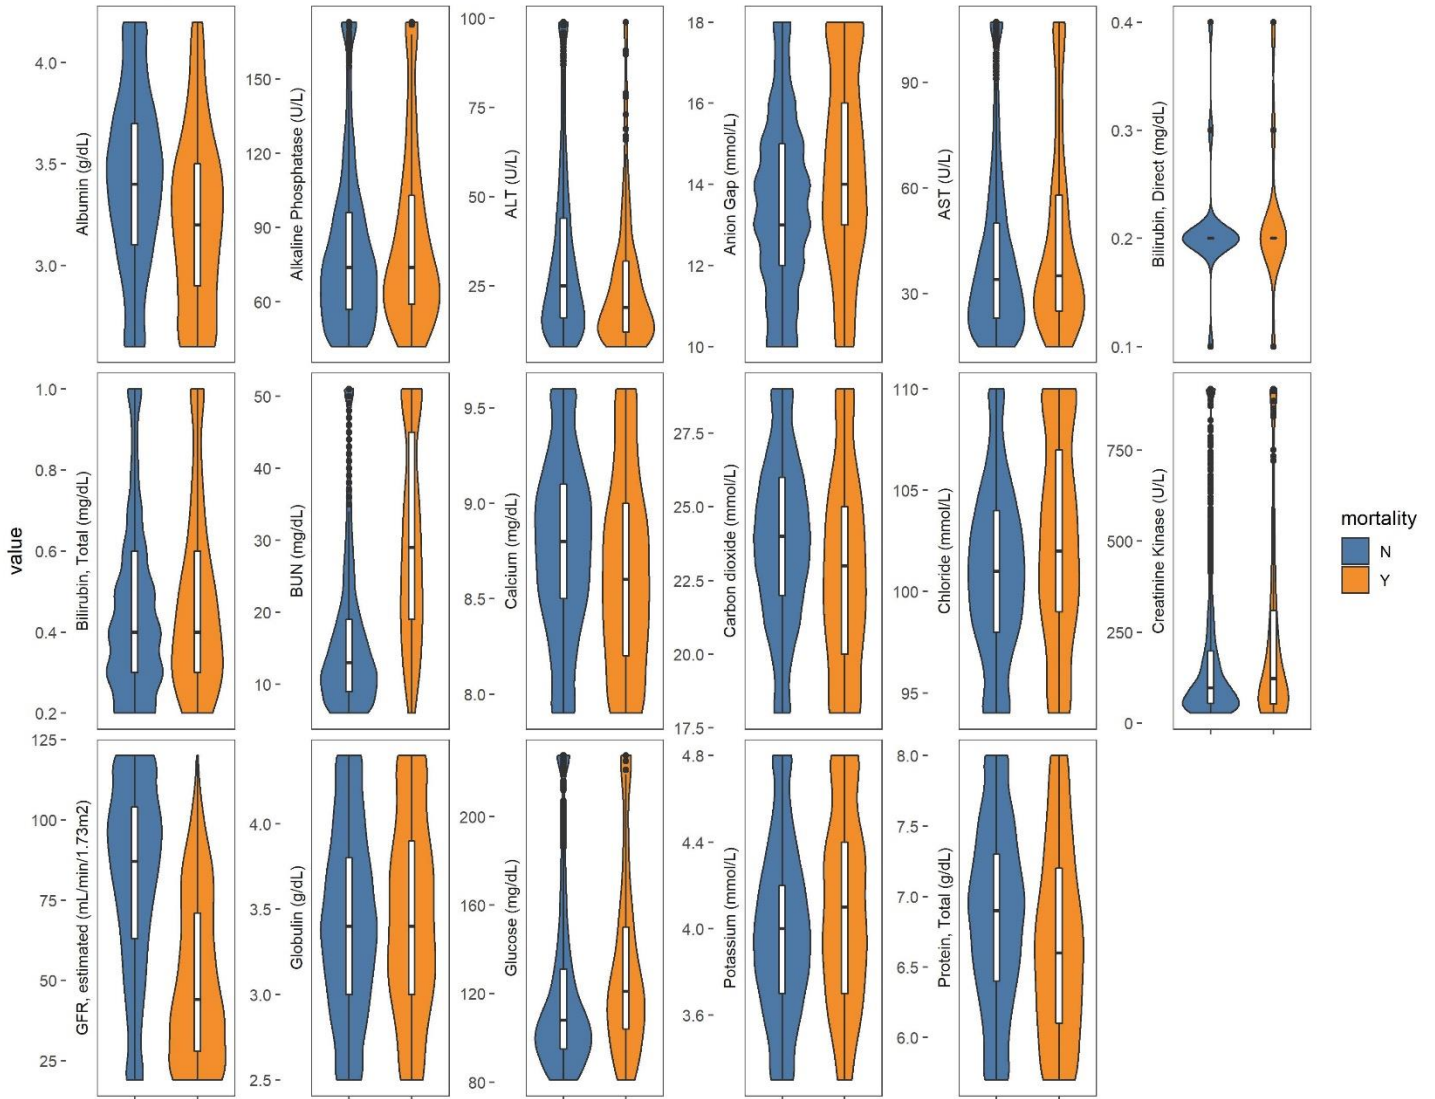

### Distribution of other blood chemistry results at baseline

Mortality contrast, n=2,511

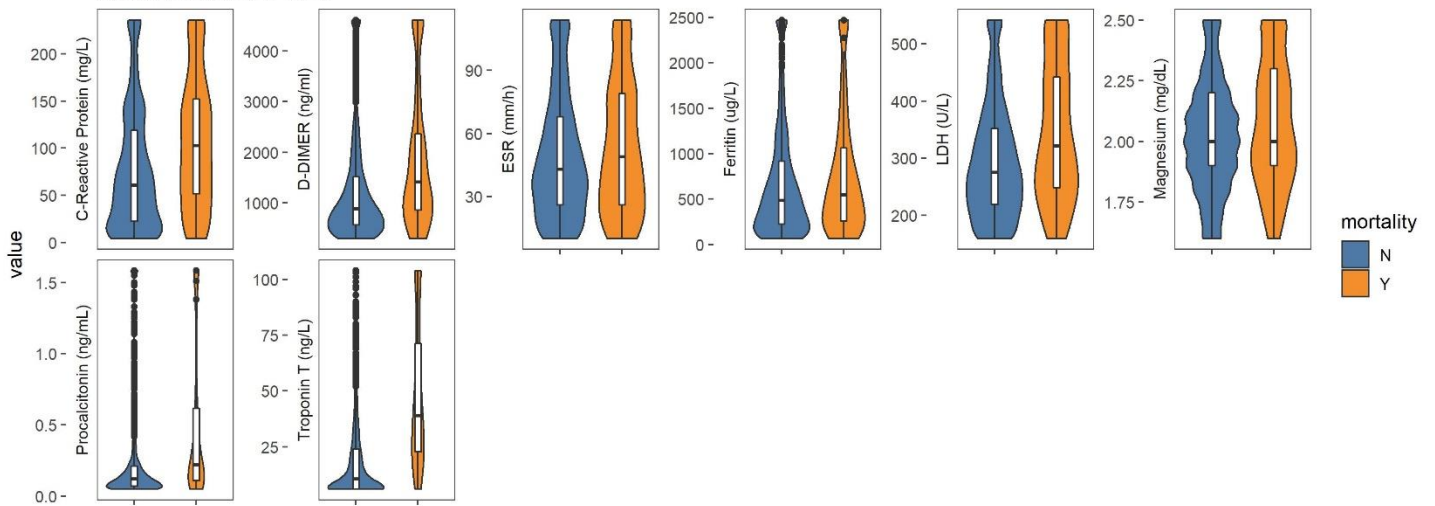

Supplement: jamanetwopen-e2023934-s001.pdf [file jamanetwopen-e2023934-s001.pdf]
